# Supplementary material
Source: PubMed Central journal article supplement (PMC2631412)
Supplement: NIHMS79166-supplement-01.pdf [file NIHMS79166-supplement-01.pdf]

**Supplementary Data Table. Primers used for sequencing of MRL mouse mitochondrial DNA**

| ID  | Start | End   | Size | Forward Primer                      | Reverse Primer                       |
|-----|-------|-------|------|-------------------------------------|--------------------------------------|
| 1.  | 1050  | 2340  | 1291 | TCTGGCCTACACCCAGAAGATTTCA           | CTGGGTCAATAAGATATGTTGATTTTACTTTGACT  |
| 2.  | 2248  | 3507  | 1260 | GGTTGGGGTGACCTCGGAGAAT              | CTGGTAAATTGATATAGTATAGGGGTCCTAGGAAGA |
| 3.  | 3407  | 4700  | 1294 | ATTCGCGTTATTCTTTATAGCAGAGTACACTAACA | TTGGTAAGAATCCTGTTAGTGGTGGAAG         |
| 4.  | 4661  | 5988  | 1328 | TCCCTAGGAGGCCTTCCACCAC              | CAAAGAAAGTTGTGTTTAGGTTGCGGTCT        |
| 5.  | 5828  | 6299  | 472  | TATTATCAACATGAAACCCCCAGCCATA        | AAGTCAGCTAAATACTTTGACACCCGGTAGG      |
| 6.  | 6123  | 6700  | 578  | GAACCTTTCGGCTATATAGGAATAGTATGAGCAAT | GATCCTATAGAAGAGACAGTGTTCATGTGGTG     |
| 7.  | 6550  | 7250  | 701  | CATGAGCAAAAGCCACTTCG                | AGGGGAGAGCAATTATGATAAGGATTACAGC      |
| 8.  | 7168  | 8461  | 1294 | TACAAGCACAATAGATGCACAAGAAGTTGA      | GAGTAGCTCCTCCGATTAGGTGATTAATAAGTGT   |
| 9.  | 8465  | 9223  | 759  | TATTAATAAATATTAGCCCACCAACAGCTACCATT | AGTCCATGGAATCCAGTAGCCATGA            |
| 10. | 9220  | 10508 | 1295 | GACTCCATGTAATTATTGGATCAACATTCCT*    | AATTAGTTCAGTTGCTGAAAAGGTTATGATTAGG*  |
| 11. | 10194 | 11503 | 1310 | CTACCACTAACCTGACTATCAAGCCCTAAAA*    | GTTAGAAGAATAAGTGGAATTATGTGAAGGGCTAT* |
| 12. | 11399 | 12666 | 1268 | CACCCAACGCGGCAAACTAAC               | CTAGTTGGCTTGATGTAGAGAAGGCAATG        |
| 13. | 12487 | 13822 | 1336 | CAATAGTAGTTGCAGGAATTTTCTACTGGTC     | TTGGGGATCTAACTGATTAATTTTGGGTTT       |
| 14. | 13701 | 14975 | 1269 | CTCCAAACCATCAAGATTAATTACTCCAA       | TGCAAATAGGAAATATCATTGCGGGTTAAT       |
| 15. | 14915 | 16280 | 1364 | TAATCCACTAAACACCCACCCCATATT         | GCGTAATAGAGTATGATTAGAGTTTGGTTACCG    |
| 16. | 16159 | 1121  | 1257 | TCAAACCTATGTCTGATCAATTCTAGTAGTTC    | TTTGTGTAGGGCTAGGGCTAGGATTAGTT        |
| 17. | 4170  | 4926  | 757  | TTCAACAACAAACAAACGGT                | GGTAGGGTTATTGTGCTTATGA               |
| 18. | 8299  | 9591  | 1293 | CTTGCCCACTTCTTCCACA                 | TTGTAGGGTCGAATCCGCAT                 |
| 19. | 14508 | 15370 | 863  | GCAGTCATAGCCACAGCATT                | GCTCCTTCTTCTGATGTCTTG                |
| 20. | 4981  | 6047  | 1067 | TCAAAGCCCTAAGAAAACACA               | GTGCCCAAAGAATCAGAACA                 |
| 21. | 13164 | 13653 | 490  | ACCAGCATTCCAGTCCTCAC                | GGGGTAGCGGCAATATATAGTT               |
| 22. | 908   | 1347  | 440  | GCCCGTCACCCTCTCAAAT                 | GCTCGTTTGGTTTCGGGGTT                 |
| 23. | 4981  | 5402  | 422  | TCAAAGCCCTAAGAAAACACA               | TCAGGCTCCGAATAGTAGATAGA              |
| 24. | 16000 | 36    | 336  | AATCATTAGTCCGCAAAACC                | TTTCAGTGCTTTGCTTTGTT                 |
| 25. | 2872  | 3466  | 595  | GTCCATACGGCATTTTACAAC               | GTTGTTAGGGCGTTTATTAGAA               |
| 26. | 3567  | 3939  | 373  | ATCCGAGCATCTTATCCACG                | ATGATGGCAAGGGTGATAGG                 |
| 27. | 9665  | 10035 | 371  | TGCTCTTACTTCCACTACCA                | GGAGTTGGAGTTTAGGGAAGT                |
| 28. | 4778  | 5332  | 555  | AACCTATTCTTTATACTCGCC               | AACATAGGTAATAATGGCTGA                |
| 29. | 1900  | 2371  | 472  | ATAAAAGGAACTCGGCAAAAC               | AGGGTAACTTGGTCCGTTGA                 |
| 30. | 10800 | 11238 | 439  | GTTACCTATGACTACCAAA                 | ATGTGGCTATAAGTGGGAAG                 |
| 31. | 11720 | 12365 | 646  | GGTGCAAAATCAAATAAAAG                | GTCGTTGTTGTTGAGAATA                  |

\*The pair of primers 10 forward and 11 reverse were used for PCR amplification of 2290 bp mtDNA fragment free from nuclear pseudogene contamination.
